# Supplementary material for: Solid-state dye-sensitized solar cells based on Zn1−xSnxO nanocomposite photoanodes
Source: Royal Society of Chemistry journal article supplement (doi:10.1039/c8ra02852d), 2018-01-01
Supplement: c8ra02852d1.pdf [file c8ra02852d1.pdf]

## Supporting Information

### Solid State Dye-Sensitized Solar Cells Based on $Zn_{1-x}Sn_xO$ Nanocomposite

#### Photoanodes

*Ayat Nasr El-Shazly<sup>1\*</sup>†, Ahmed Esmail Shalan<sup>1\*</sup>†, Mohamed Mohamed Rashad<sup>1</sup>, Elsayed Ali Abdel-Aal<sup>1</sup>, Ibrahim Ahmed Ibrahim<sup>1</sup> and Mohamed F. El-Shahat<sup>2</sup>*

<sup>1</sup> Central Metallurgical Research and Development Institute, P.O. Box 87, Postal code: 11422, Helwan, Cairo, Egypt

<sup>2</sup> Chemistry Department, Faculty of Science, Ain Shams University, Postal code: 11566, Cairo, Egypt

\* Corresponding Author: E-mail: (A. E. Shalan) [a.shalan133@gmail.com](mailto:a.shalan133@gmail.com); [a.shalan@cmrdi.sci.eg](mailto:a.shalan@cmrdi.sci.eg)  
Fax: +202-25010639; Tel: +202-25010640-43, 11422, Cairo, Egypt.

E-mail: (A. N. El-Shazly) [ayatelshazly@gmail.com](mailto:ayatelshazly@gmail.com); Fax: +202-25010639; Tel: +202-25010640-43, 11422, Cairo, Egypt.

† (A. N. El-Shazly) and (A. E. Shalan) contribute equally to this manuscript.

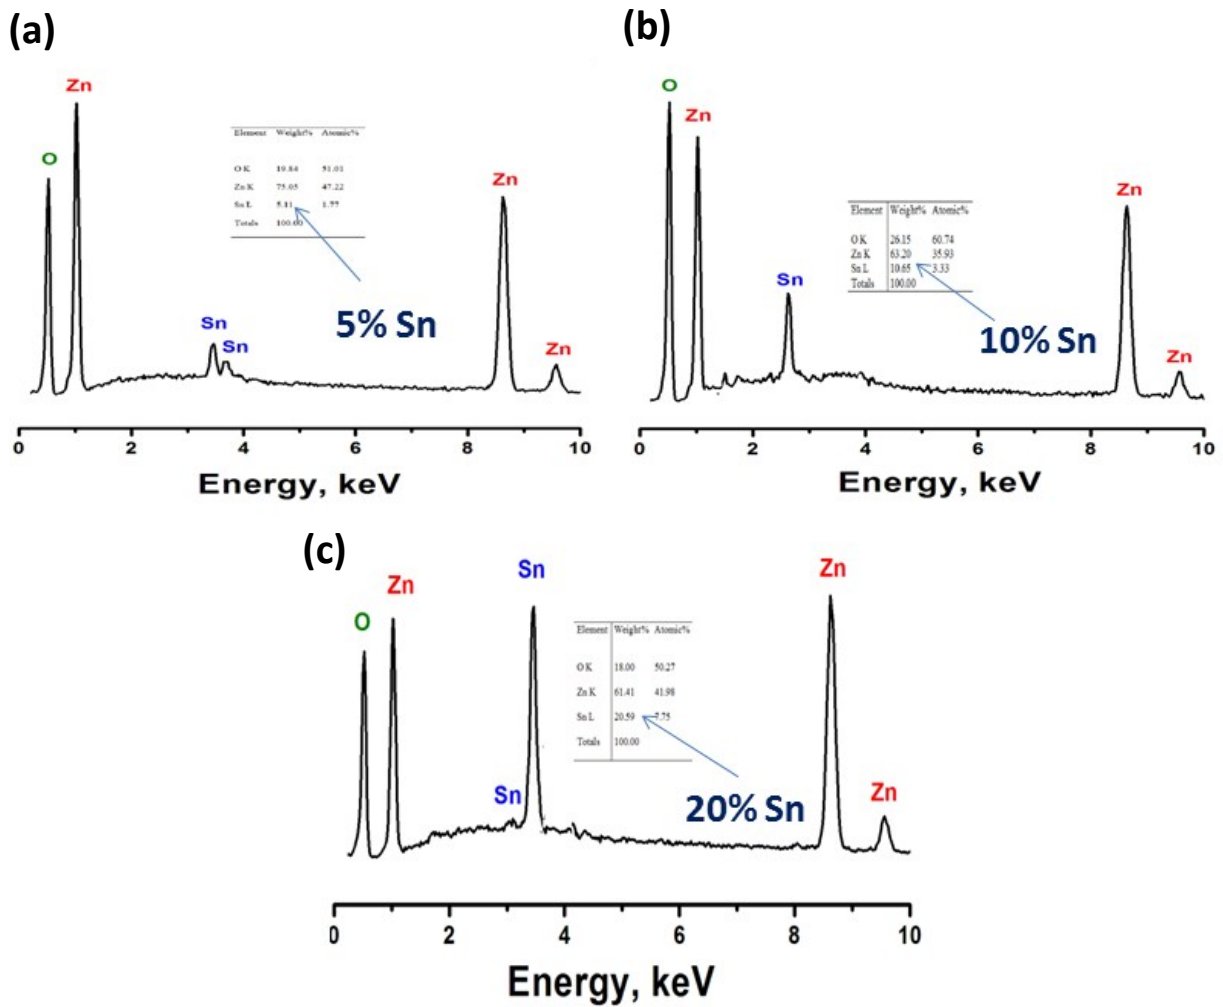

**Figure S1:** Energy dispersive X-ray spectroscopy (EDX) analysis data of the produced nanocomposites

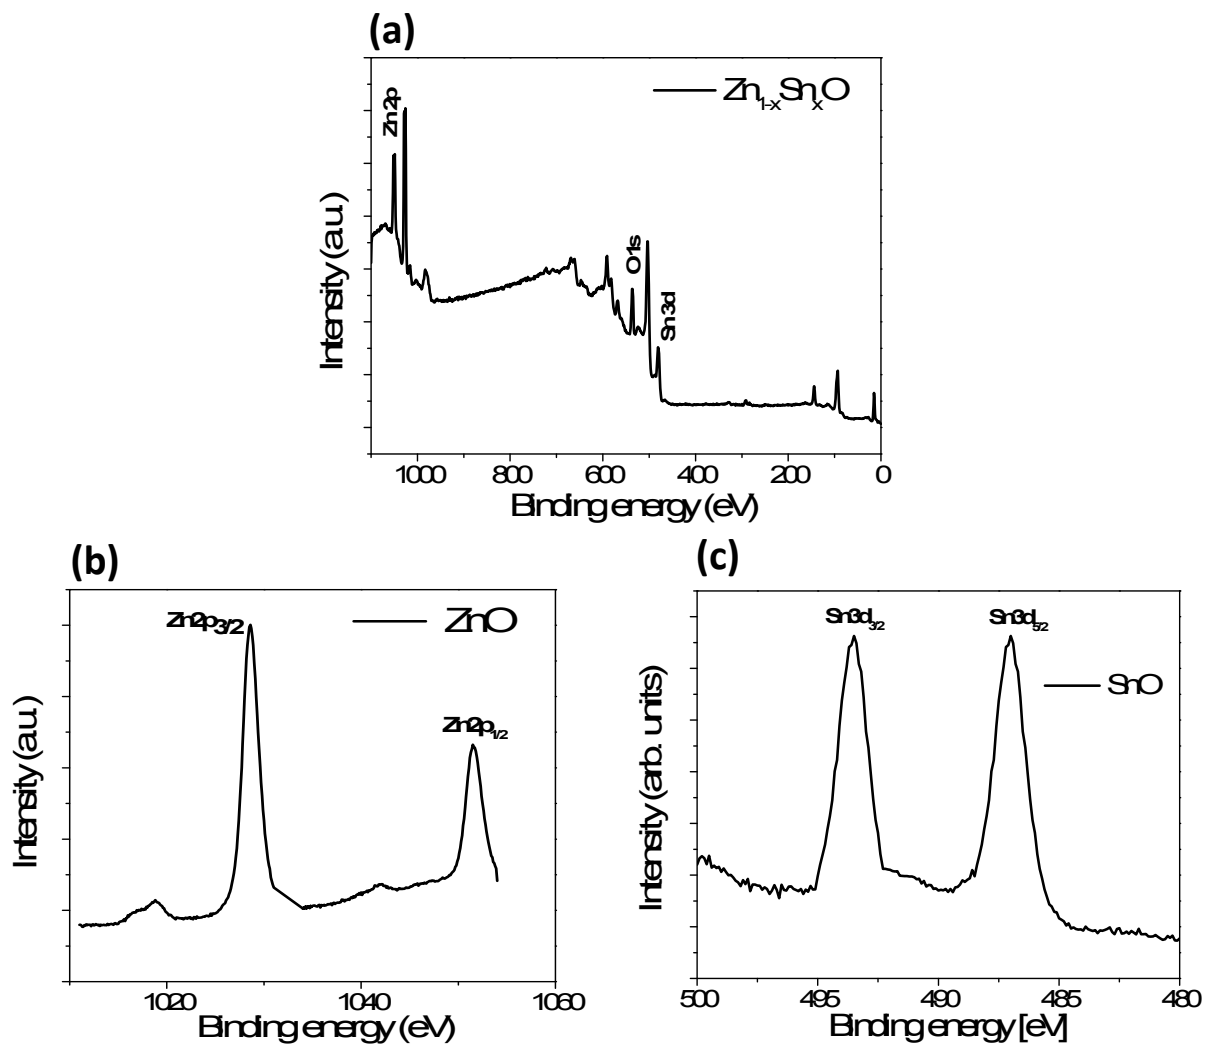

**Figure S2:** XPS of (a) wide range of  $Zn_{1-x}Sn_xO$  nanocomposites, (b) and (c) narrow range of SnO and ZnO nanoparticles, respectively

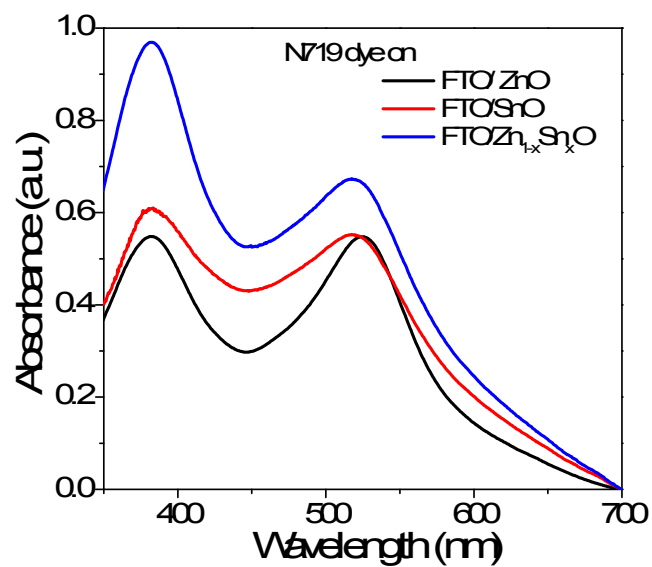

**Figure S3:** Optical absorbance of the dissolved-out dyes of the pure SnO, the pure ZnO and Zn<sub>1-x</sub>Sn<sub>x</sub>O nanocomposite, respectively loaded on Ru N719 dye.

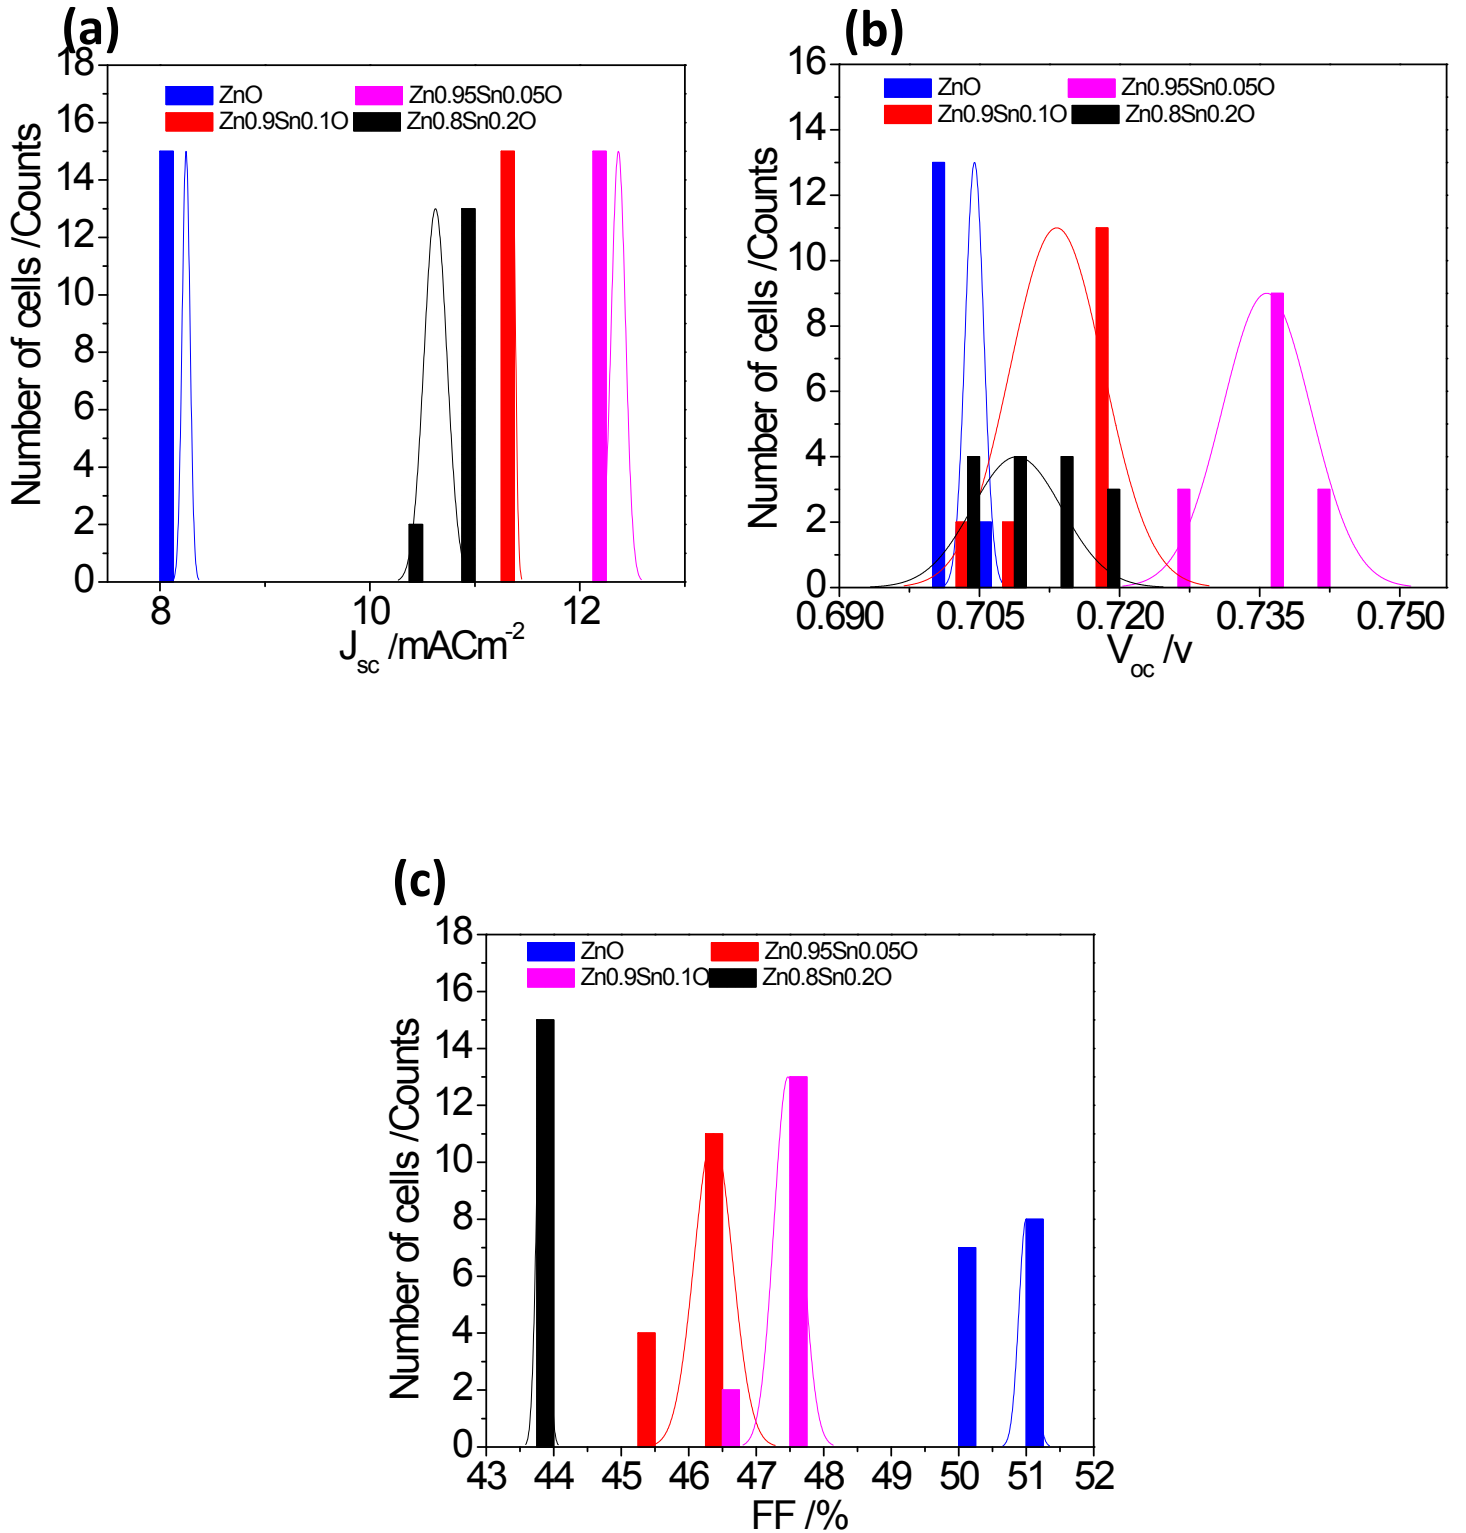

**Figure S4.** The  $J_{sc}$ ,  $V_{oc}$  and FF distribution histogram (a, b and c), respectively of the pure ZnO (blue color), Zn<sub>0.95</sub>Sn<sub>0.05</sub>O (purple color), Zn<sub>0.9</sub>Sn<sub>0.1</sub>O (red color) and Zn<sub>0.8</sub>Sn<sub>0.2</sub>O (black color), respectively.

**Table S1.** Photovoltaic parameters of fifteen ss-DSSCs devices made of pure ZnO under simulated AM-1.5G illumination (power density 100 mW cm<sup>-2</sup>) with active area 0.25 cm<sup>2</sup>.

| # of cells     | J <sub>sc</sub> (mA/cm <sup>2</sup> ) | V <sub>oc</sub> (V) | FF (%)     | PCE (%)   |
|----------------|---------------------------------------|---------------------|------------|-----------|
| 1              | 8.31                                  | 0.706               | 51.10      | 3.00      |
| 2              | 8.30                                  | 0.705               | 51.00      | 2.98      |
| 3              | 8.25                                  | 0.705               | 50.99      | 2.97      |
| 4              | 8.26                                  | 0.704               | 50.99      | 2.97      |
| 5              | 8.26                                  | 0.705               | 50.98      | 3.00      |
| 6              | 8.25                                  | 0.706               | 50.98      | 2.97      |
| 7              | 8.27                                  | 0.704               | 51.11      | 2.98      |
| 8              | 8.21                                  | 0.705               | 51.10      | 2.95      |
| 9              | 8.22                                  | 0.703               | 51.00      | 2.99      |
| 10             | 8.23                                  | 0.705               | 51.00      | 2.96      |
| 11             | 8.30                                  | 0.703               | 51.10      | 2.98      |
| 12             | 8.19                                  | 0.704               | 50.90      | 2.93      |
| 13             | 8.19                                  | 0.704               | 50.95      | 2.94      |
| 14             | 8.24                                  | 0.703               | 51.09      | 2.96      |
| 15             | 8.24                                  | 0.705               | 50.69      | 2.99      |
| <b>average</b> | 8.25±0.03                             | 0.704±0.001         | 50.99±0.10 | 2.98±0.02 |

**Table S2.** Photovoltaic parameters of fifteen ss-DSSCs devices made of  $Zn_{0.95}Sn_{0.05}O$  under simulated AM-1.5G illumination (power density  $100 \text{ mW cm}^{-2}$ ) with active area  $0.25 \text{ cm}^2$ .

| # of cells     | $J_{sc}(\text{mA/cm}^2)$ | $V_{oc} \text{ (V)}$ | FF (%)           | PCE (%)         |
|----------------|--------------------------|----------------------|------------------|-----------------|
| 1              | 12.45                    | 0.740                | 46.70            | 4.30            |
| 2              | 12.40                    | 0.735                | 46.50            | 4.23            |
| 3              | 12.35                    | 0.735                | 46.56            | 4.22            |
| 4              | 12.45                    | 0.740                | 46.60            | 4.29            |
| 5              | 12.40                    | 0.736                | 45.99            | 4.19            |
| 6              | 12.38                    | 0.739                | 46.25            | 4.23            |
| 7              | 12.39                    | 0.736                | 46.67            | 4.26            |
| 8              | 12.40                    | 0.725                | 46.62            | 4.19            |
| 9              | 12.43                    | 0.729                | 46.57            | 4.21            |
| 10             | 12.36                    | 0.728                | 46.37            | 4.17            |
| 11             | 12.35                    | 0.737                | 45.95            | 4.18            |
| 12             | 12.25                    | 0.739                | 45.93            | 4.16            |
| 13             | 12.25                    | 0.738                | 46.45            | 4.20            |
| 14             | 12.25                    | 0.739                | 46.34            | 4.20            |
| 15             | 12.39                    | 0.740                | 45.96            | 4.21            |
| <b>average</b> | $12.36 \pm 0.06$         | $0.736 \pm 0.001$    | $46.36 \pm 0.28$ | $4.22 \pm 0.04$ |

**Table S3.** Photovoltaic parameters of fifteen ss-DSSCs devices made of  $Zn_{0.9}Sn_{0.1}O$  under simulated AM-1.5G illumination (power density  $100 \text{ mW cm}^{-2}$ ) with active area  $0.25 \text{ cm}^2$ .

| # of cells     | $J_{sc}(\text{mA/cm}^2)$ | $V_{oc} \text{ (V)}$ | FF (%)           | PCE (%)         |
|----------------|--------------------------|----------------------|------------------|-----------------|
| 1              | 11.40                    | 0.719                | 47.60            | 3.90            |
| 2              | 11.35                    | 0.715                | 47.55            | 3.86            |
| 3              | 11.40                    | 0.716                | 47.56            | 3.88            |
| 4              | 11.30                    | 0.715                | 47.50            | 3.84            |
| 5              | 11.33                    | 0.705                | 47.55            | 3.81            |
| 6              | 11.34                    | 0.706                | 47.58            | 3.81            |
| 7              | 11.36                    | 0.705                | 47.58            | 3.81            |
| 8              | 11.38                    | 0.706                | 46.99            | 3.78            |
| 9              | 11.33                    | 0.715                | 46.95            | 3.80            |
| 10             | 11.34                    | 0.716                | 47.48            | 3.86            |
| 11             | 11.36                    | 0.715                | 47.59            | 3.87            |
| 12             | 11.38                    | 0.718                | 47.52            | 3.88            |
| 13             | 11.38                    | 0.718                | 47.50            | 3.88            |
| 14             | 11.35                    | 0.715                | 47.55            | 3.86            |
| 15             | 11.37                    | 0.715                | 47.55            | 3.87            |
| <b>average</b> | $11.36 \pm 0.03$         | $0.713 \pm 0.0005$   | $47.47 \pm 0.21$ | $3.85 \pm 0.04$ |



**Table S4.** Photovoltaic parameters of fifteen ss-DSSCs devices made of  $Zn_{0.8}Sn_{0.2}O$  under simulated AM-1.5G illumination (power density  $100 \text{ mW cm}^{-2}$ ) with active area  $0.25 \text{ cm}^2$ .

| # of cells     | $J_{sc}(\text{mA/cm}^2)$ | $V_{oc} \text{ (V)}$ | FF (%)           | PCE (%)         |
|----------------|--------------------------|----------------------|------------------|-----------------|
| 1              | 10.76                    | 0.719                | 43.90            | 3.40            |
| 2              | 10.75                    | 0.705                | 43.85            | 3.32            |
| 3              | 10.74                    | 0.705                | 43.88            | 3.32            |
| 4              | 10.75                    | 0.703                | 43.87            | 3.32            |
| 5              | 10.75                    | 0.715                | 43.88            | 3.37            |
| 6              | 10.68                    | 0.706                | 43.85            | 3.31            |
| 7              | 10.50                    | 0.706                | 43.85            | 3.25            |
| 8              | 10.55                    | 0.706                | 43.89            | 3.27            |
| 9              | 10.58                    | 0.703                | 43.90            | 3.27            |
| 10             | 10.48                    | 0.708                | 43.85            | 3.25            |
| 11             | 10.46                    | 0.710                | 43.75            | 3.25            |
| 12             | 10.59                    | 0.710                | 43.70            | 3.29            |
| 13             | 10.53                    | 0.715                | 43.68            | 3.29            |
| 14             | 10.58                    | 0.712                | 43.75            | 3.30            |
| 15             | 10.66                    | 0.712                | 43.76            | 3.32            |
| <b>average</b> | $10.62 \pm 0.11$         | $0.709 \pm 0.005$    | $43.82 \pm 0.07$ | $3.30 \pm 0.04$ |
